# Supplementary material for: MnCO 3 –Au nanoparticles to enable catalytic tumor inhibition with immune activation
Source: Royal Society of Chemistry journal article supplement (doi:10.1039/d4tb02108h), 2024-11-20
Supplement: d4tb02108h1.pdf [file d4tb02108h1.pdf]

## Supporting Information

### **MnCO<sub>3</sub>-Au Nanoparticles to Enable Catalytic Tumor Inhibition with Immune Activation**

*Yingpei Yao* ‡<sup>a</sup>, *Zijie Lu* ‡<sup>b</sup>, *Yike Fu*<sup>a, c</sup>\*, *Xiang Li*<sup>a, c</sup>\*

<sup>a</sup> State Key Laboratory of Silicon and Advanced Semiconductor Materials, School of Materials Science and Engineering, Zhejiang University, Hangzhou 310058, P. R. China

<sup>b</sup> Innovation Institute for Artificial Intelligence in Medicine, Zhejiang University, Hangzhou 310018, P. R. China

<sup>c</sup> ZJU-Hangzhou Global Science and Technology Innovation Center, Zhejiang University, Hangzhou 311215, P. R. China

\* Corresponding authors

E-mail: [fyk3927@zju.edu.cn](mailto:fyk3927@zju.edu.cn) (Y. Fu), [xiang.li@zju.edu.cn](mailto:xiang.li@zju.edu.cn) (X. Li)

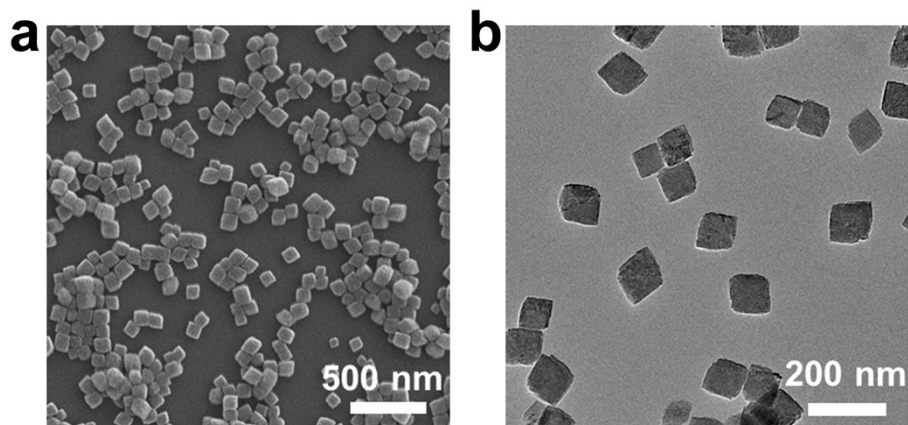

**Figure S1.** (a) SEM image and (b) TEM image of  $\text{MnCO}_3$  nanoparticles.

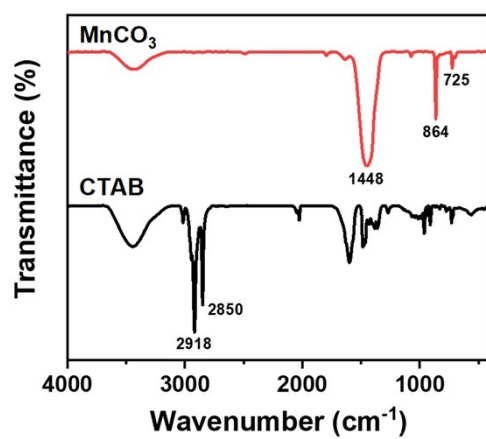

**Figure S2.** FTIR spectra of CTAB and as-prepared  $\text{MnCO}_3$  nanoparticles.

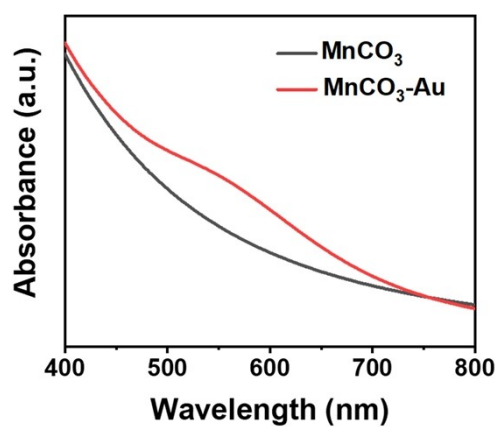

**Figure S3.** UV-Vis spectra of  $\text{MnCO}_3$  and  $\text{MnCO}_3\text{-Au}$ .

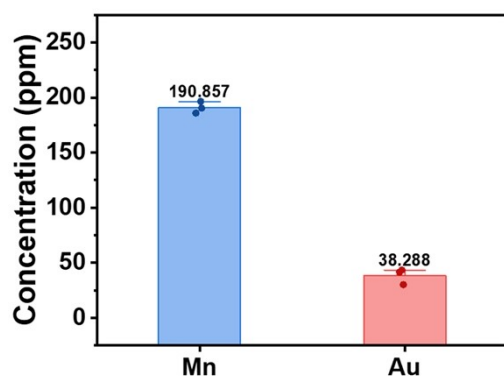

**Figure S4.** The concentrations of Mn and Au in the digestion solution of MnCO<sub>3</sub>-Au nanoparticles determined by ICP-OES.

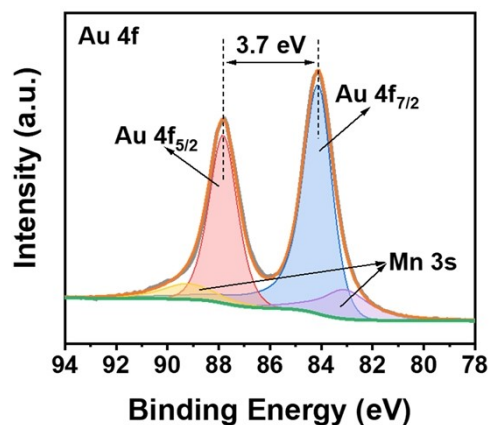

**Figure S5.** High-resolution Au 4f XPS spectrum of MnCO<sub>3</sub>-Au.

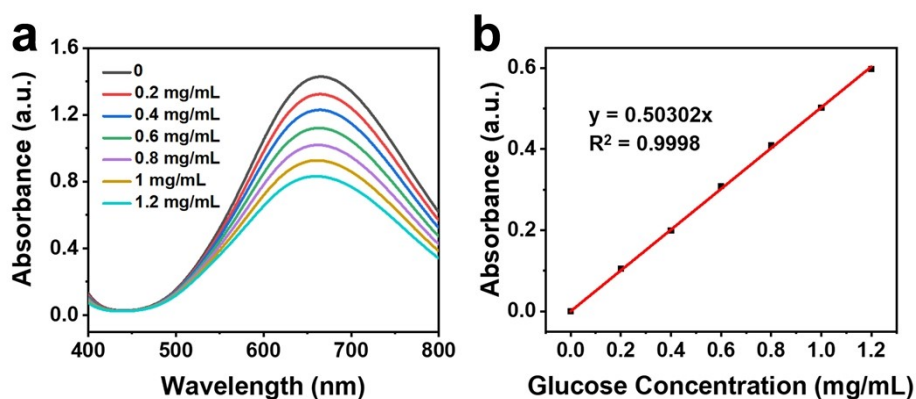

**Figure S6.** (a) UV-Vis absorption spectra of Fehling's reagent reacted with different concentrations of glucose. (b) The standard curve of absorbance difference at 663 nm versus glucose concentration.

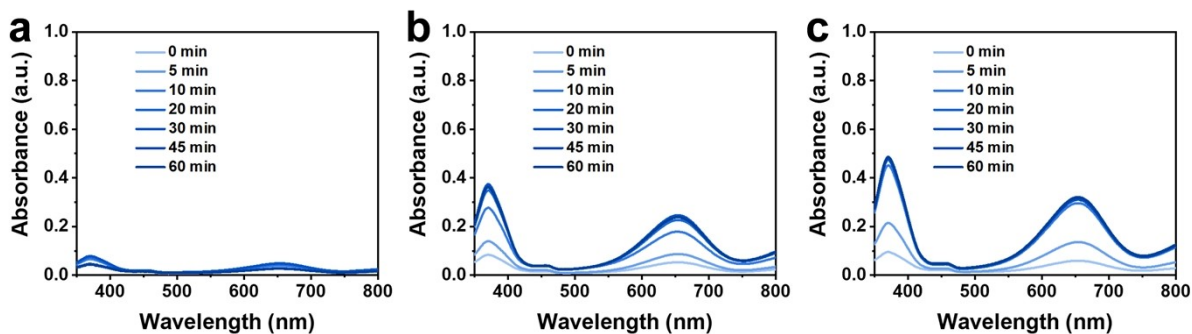

**Figure S7.** UV-Vis absorption spectra of TMB oxidized by generated  $\text{H}_2\text{O}_2$  in (a) 0 mg/mL, (b) 0.5 mg/mL, and (c) 1 mg/mL glucose solutions at different time points with the addition of 500  $\mu\text{g/mL}$   $\text{MnCO}_3\text{-Au}$ .

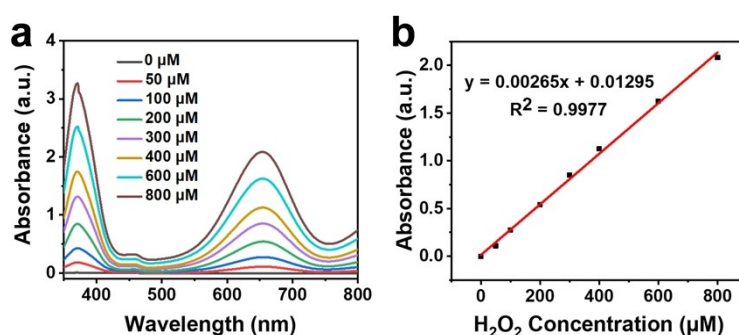

**Figure S8.** (a) UV-Vis absorption spectra of TMB oxidized by various concentrations of  $\text{H}_2\text{O}_2$ . (b) The standard curve of absorbance at 652 nm versus  $\text{H}_2\text{O}_2$  concentration.

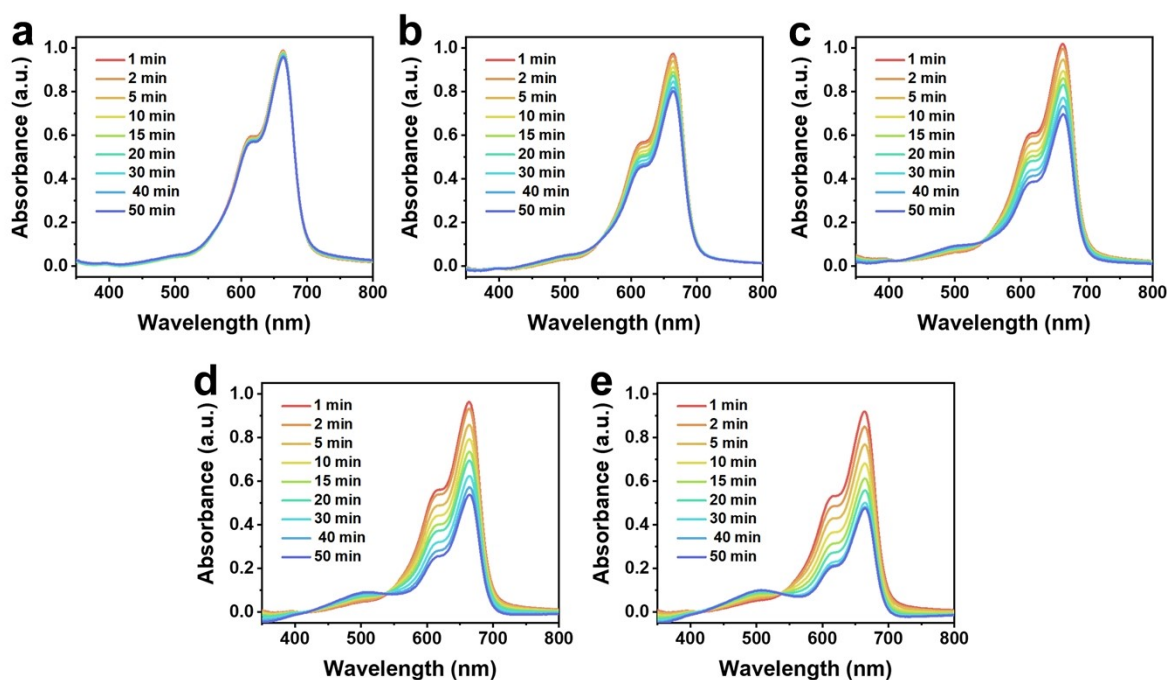

**Figure S9.** UV-Vis absorption spectra of MB solutions containing 500  $\mu\text{g/mL}$   $\text{MnCO}_3\text{-Au}$  and (a) 0 mg/mL, (b) 0.1 mg/mL, (c) 0.3 mg/mL, (d) 0.5 mg/mL, (e) 1 mg/mL glucose.

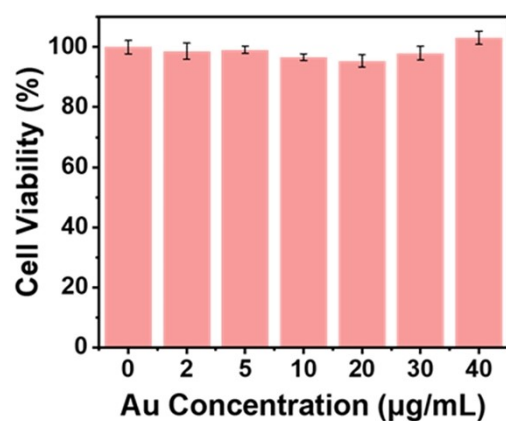

**Figure S10.** 4T1 cell viabilities after incubation with different concentrations of AuNPs for 24 h.

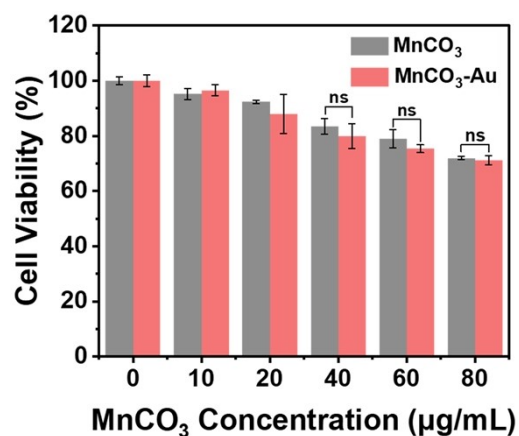

**Figure S11.** 4T1 cell viabilities after incubation with MnCO<sub>3</sub> and MnCO<sub>3</sub>-Au in glucose-free RPMI 1640 medium.

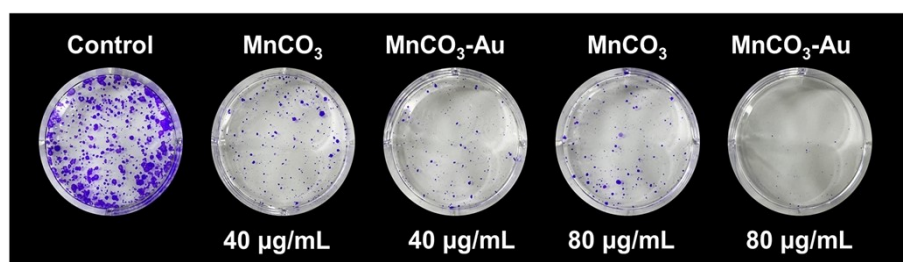

**Figure S12.** Colony formation of 4T1 cells after different treatments.

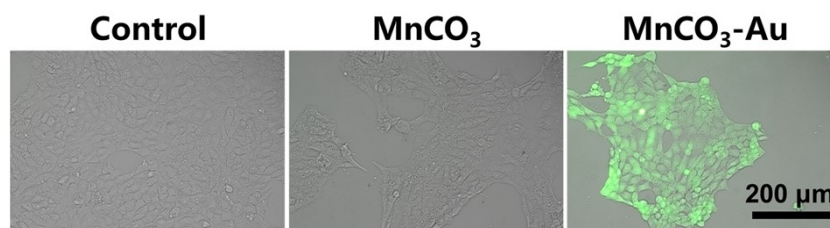

**Figure S13.** The bright-field images merged with fluorescence images of DCFH-DA stained 4T1 cells after being incubated with PBS,  $\text{MnCO}_3$ , and  $\text{MnCO}_3\text{-Au}$ .

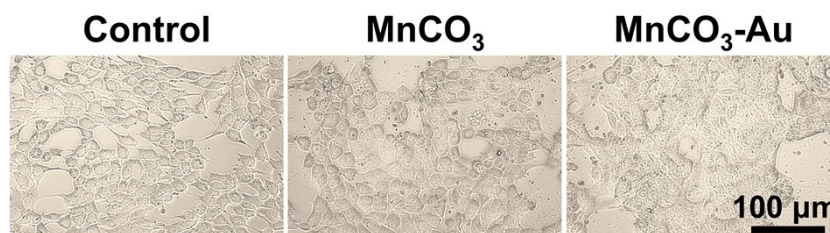

**Figure S14.** The bright-field images of JC-1 stained 4T1 cells after being treated with PBS,  $\text{MnCO}_3$ , and  $\text{MnCO}_3\text{-Au}$ .

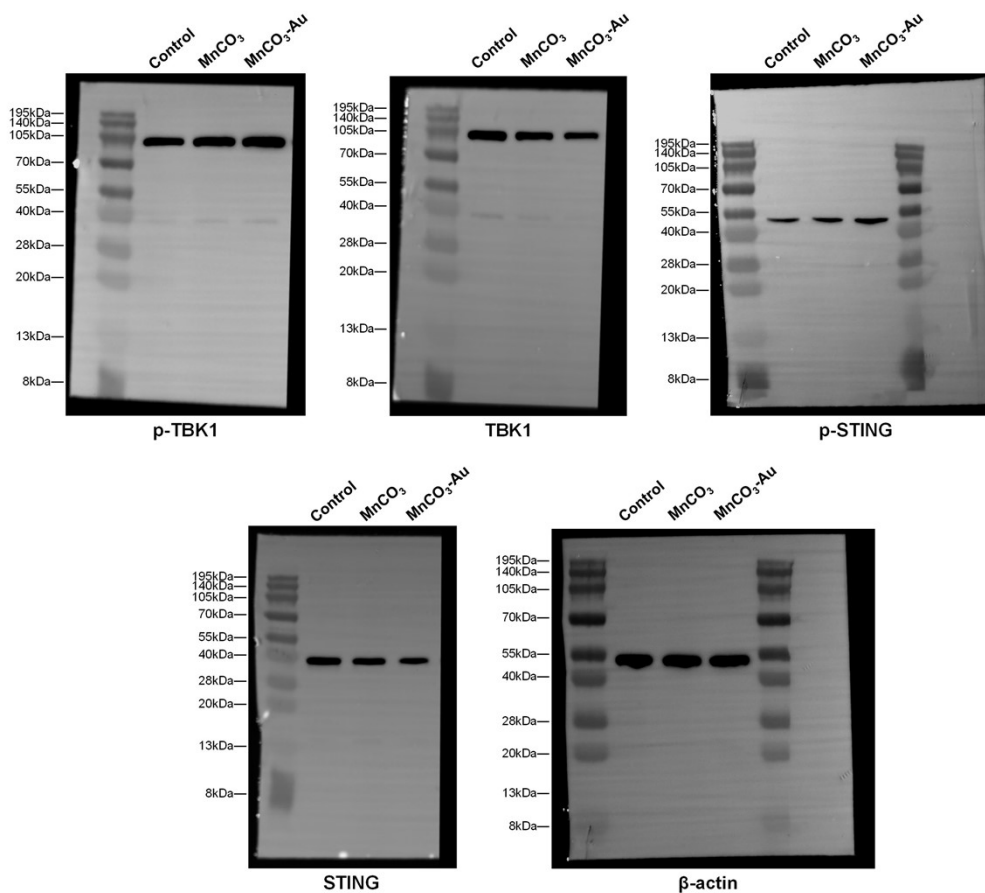

**Figure S15.** Raw data associated with Fig. 4d. Lanes were not cropped or rearranged when presenting the results in Fig. 4d.

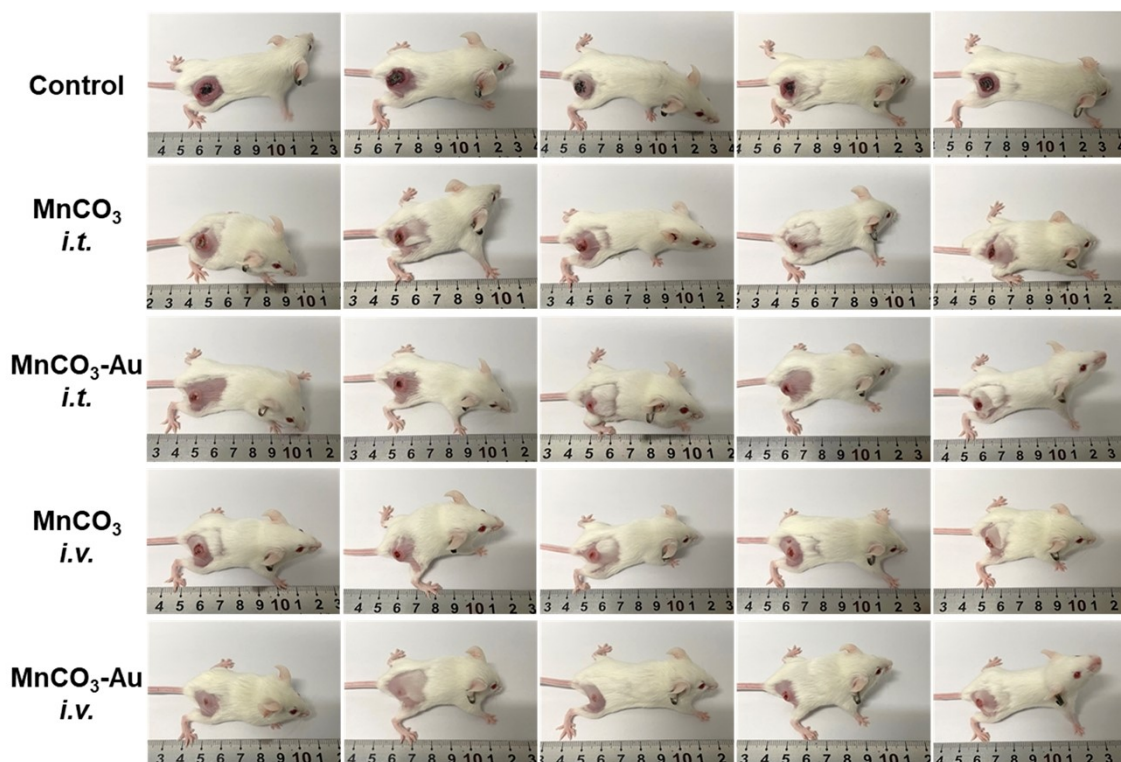

**Figure S16.** Photographs of tumor-bearing mice on day 14 after different treatments.

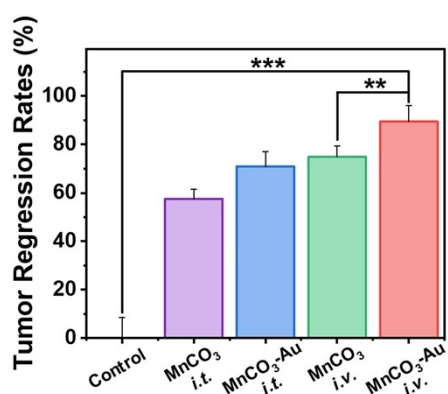

**Figure S17.** Tumor regression rates on day 14 after different treatments.

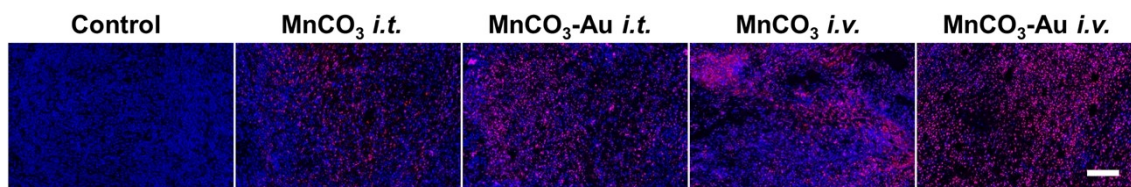

**Figure S18.** TUNEL immunofluorescence staining images of the tumors collected on day 14 after different treatments (scale bar: 100  $\mu$ m).

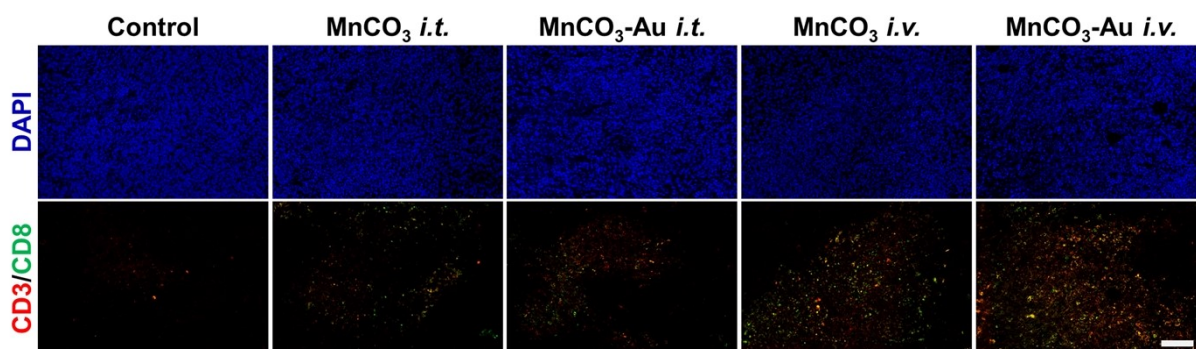

**Figure S19.** Immunofluorescence staining images of CD8<sup>+</sup> T cells in the tumors collected on day 14 after different treatments. CD3 is stained in red fluorescence and CD8 is stained in green fluorescence (scale bar: 100  $\mu$ m).

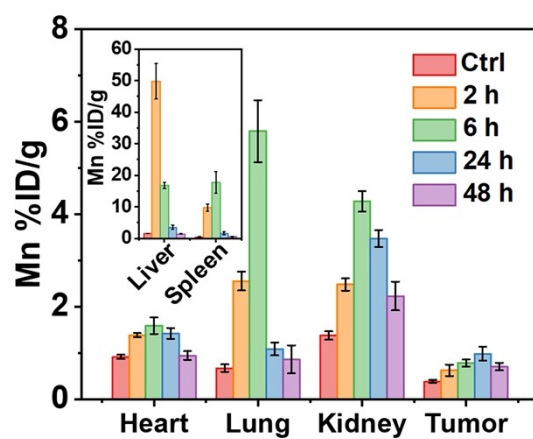

**Figure S20.** Biodistribution of Mn at various time points after intravenous injection of MnCO<sub>3</sub>-Au ( $n = 3$ , mean  $\pm$  SD).

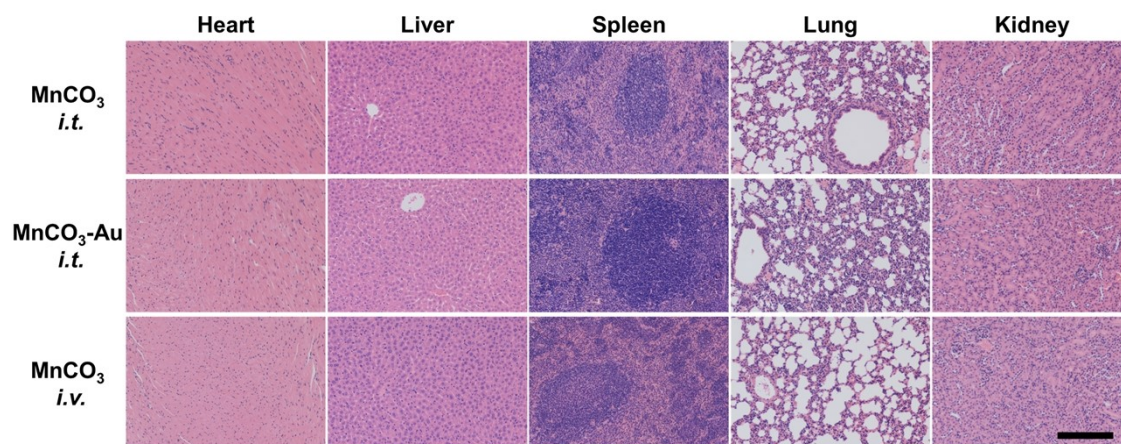

**Figure S21.** H&E staining images of major organs collected from mice after different treatments (scale bar: 200  $\mu$ m).
